# Supplementary material for: Occurrence of adverse events and change in disease activity after initiation of etanercept in paediatric patients with juvenile psoriatic arthritis in the CARRA Registry
Source: HighWire-hosted journal article supplement (doi:10.1136/rmdopen-2022-002943), 2023-05-01
Supplement: rmdopen-2022-002943supp001_data_supplement.pdf [file rmdopen-2022-002943supp001_data_supplement.pdf]

**SUPPLEMENTARY MATERIAL****Occurrence of adverse events and change in disease activity after initiation of etanercept in pediatric patients with juvenile psoriatic arthritis in the CARRA Registry****Authors and Institutions**

Colleen K. Correll,<sup>1</sup> Scott Stryker,<sup>2</sup> David Collier,<sup>2</sup> Thomas A. Phillips,<sup>3</sup> Anne C. Dennis,<sup>3</sup> Stephen J. Balevic,<sup>3</sup> Timothy Beukelman,<sup>4</sup> on behalf of the CARRA Registry Investigators

<sup>1</sup>Department of Pediatrics, University of Minnesota, Minneapolis, Minnesota, USA; <sup>2</sup>Amgen Inc., Thousand Oaks, California, USA; <sup>3</sup>Duke Clinical Research Institute, Durham, North Carolina, USA;

<sup>4</sup>Department of Pediatrics, University of Alabama at Birmingham, Birmingham, Alabama, USA

**Corresponding Author**

Colleen K. Correll, MD; Department of Pediatrics, University of Minnesota; 2450 Riverside Ave S., East Bldg Rm 668; Minneapolis, MN 55410; USA. Phone: +1 612-365-6777; Email: [corr0250@umn.edu](mailto:corr0250@umn.edu)

**Target Journal:** *RMD Open*

**Supplementary materials:** 4 tables

**Supplementary Table 1.** List of prespecified adverse events of special interest by alphabetical order

---

| Adverse Event Type                                                  |
|---------------------------------------------------------------------|
| Anaphylaxis/hypersensitivity reaction                               |
| Any malignancy                                                      |
| Any malignancy, excluding non-melanoma skin cancer                  |
| Aplastic anemia                                                     |
| Bleeding events requiring transfusion or hospitalization evaluation |
| Cardiovascular event (myocardial infarction or stroke)              |
| Demyelinating disease                                               |
| Gastrointestinal perforation                                        |
| Hepatic events                                                      |
| Hepatitis                                                           |
| Hypercholesterolemia                                                |
| Hypersensitivity reaction                                           |
| Infections treated with intravenous anti-infectives                 |
| Inflammatory bowel disease                                          |
| Interstitial lung disease                                           |
| Leukopenia                                                          |
| Lipoid pneumonia                                                    |
| Macrophage activation syndrome                                      |
| Neutropenia                                                         |
| New autoimmune disease                                              |
| Optic neuritis                                                      |
| Other opportunistic infections                                      |
| Pregnancy                                                           |
| Progressive multifocal leukoencephalopathy                          |
| Pulmonary alveolar proteinosis                                      |
| Pulmonary hypertension                                              |
| Thrombocytopenia                                                    |
| Tuberculosis (active)                                               |
| Tuberculosis (inactive/latent)                                      |
| Uveitis                                                             |
| Venous thrombotic event                                             |

---

**Supplementary Table 2.** Effectiveness outcomes

| Outcome                                   | Derivation/Definition                                                                                                                                                                                                                                                                                                                                                                                                                                                                                                                                                                                                                                                                                                                                                                                                                                                      | Reference                                                                                                                                                                                                     |
|-------------------------------------------|----------------------------------------------------------------------------------------------------------------------------------------------------------------------------------------------------------------------------------------------------------------------------------------------------------------------------------------------------------------------------------------------------------------------------------------------------------------------------------------------------------------------------------------------------------------------------------------------------------------------------------------------------------------------------------------------------------------------------------------------------------------------------------------------------------------------------------------------------------------------------|---------------------------------------------------------------------------------------------------------------------------------------------------------------------------------------------------------------|
| ACR-Pedi Response criteria                | Derived from the Physician Global Assessment of Disease Activity, Patient/Parent Global Assessment of Disease Activity, Active Joint Count, Limited Range of Motion Joint Count, CHAQ Score, and CRP laboratory value variables collected in the CARRA Registry                                                                                                                                                                                                                                                                                                                                                                                                                                                                                                                                                                                                            | Giannini et al. <i>Arthritis Rheum.</i> 1997;40(7):1202-1209.                                                                                                                                                 |
| ACR30                                     | At least a 30% improvement from baseline in three of six variables with no more than one remaining variable worsening by > 30%.                                                                                                                                                                                                                                                                                                                                                                                                                                                                                                                                                                                                                                                                                                                                            |                                                                                                                                                                                                               |
| ACR50                                     | At least a 50% improvement from baseline in three of six variables with no more than one remaining variable worsening by >30%.                                                                                                                                                                                                                                                                                                                                                                                                                                                                                                                                                                                                                                                                                                                                             |                                                                                                                                                                                                               |
| ACR70                                     | At least a 70% improvement from baseline in three of six variables with no more than one remaining variable worsening by >30%.                                                                                                                                                                                                                                                                                                                                                                                                                                                                                                                                                                                                                                                                                                                                             |                                                                                                                                                                                                               |
| ACR90                                     | At least a 90% improvement from baseline in three of six variables with no more than one remaining variable worsening by >30%.                                                                                                                                                                                                                                                                                                                                                                                                                                                                                                                                                                                                                                                                                                                                             |                                                                                                                                                                                                               |
| cJADAS-10                                 | Derived from the Physician Global Assessment of Disease Activity, Patient/Parent Global Assessment of Disease Activity, Active Joint Count (capped at 10) variables collected in the CARRA Registry; the cJADAS-10 is the sum of these three scores.                                                                                                                                                                                                                                                                                                                                                                                                                                                                                                                                                                                                                       | Consolaro et al. <i>Arthritis Rheum.</i> 2009;61(5):658-666.<br>McErlane et al. <i>Ann Rheum Dis.</i> 2013;72(12):1983-1988.<br>Consolaro et al. <i>Arthritis Care Res (Hoboken)</i> . 2014;66(11):1703-1709. |
| ACR provisional inactive disease criteria | Derived from the Physician Global Assessment of Disease Activity, Active Joint Count, ESR and CRP laboratory values, clinical features of systemic JIA, presence of uveitis, duration of morning stiffness variables collected in the CARRA Registry.<br>To meet ACR Provisional Inactive Disease Criteria: <ul style="list-style-type: none"> <li>▪ Active Joint Count must be 0</li> <li>▪ Physician Global Assessment of Disease Activity must be 0 or 0.5</li> <li>▪ ESR and CRP laboratory values must be in the normal range (less than the upper limit of normal or if abnormal, not due to rheumatic disease)</li> <li>▪ No clinical features of systemic JIA may be present (includes fever, rash, serositis, splenomegaly, or generalized lymphadenopathy)</li> <li>▪ No active uveitis</li> <li>▪ No morning stiffness (or duration &lt; 15 minutes)</li> </ul> | Wallace et al. <i>Arthritis Care Res (Hoboken)</i> . 2011;63(7):929-936.                                                                                                                                      |

| Outcome | Derivation/Definition                                                                                                                                                                                                                                                                                                                                                   | Reference |
|---------|-------------------------------------------------------------------------------------------------------------------------------------------------------------------------------------------------------------------------------------------------------------------------------------------------------------------------------------------------------------------------|-----------|
|         | To determine whether ACR Provisional Inactive Disease Criteria are met, active joint count and physician global assessment cannot be missing. If either variable is missing, the score cannot be calculated. If any of the other variables are missing but active joint count is 0 and the physician global score is 0 or 0.5, inactive disease is calculated as “yes.” |           |

ACR = American College of Rheumatology; ACR-Pedi Response = American College of Rheumatology-Pediatric Response; CARRA = Childhood Arthritis and Rheumatology Research Alliance; CHAQ = Childhood Health Assessment Questionnaire; cJADAS-10 = clinical Juvenile Arthritis Disease Activity Score 10-joint; CRP = C-reactive protein; ESR = erythrocyte sedimentation rate; JIA = juvenile idiopathic arthritis.

**Supplementary Table 3.** ACR-Pedi, cJADAS-10, and ACR provisional clinical inactive disease responses with etanercept in the effectiveness cohort by LOCF

| Outcome                                                                   | Response                       |                                 |
|---------------------------------------------------------------------------|--------------------------------|---------------------------------|
|                                                                           | At 6-month follow-up<br>N = 41 | At 12-month follow-up<br>N = 34 |
| ACR-Pedi Response, n (%) [no. of patients with complete data]             |                                |                                 |
| ACR30                                                                     | 14 (58.3) [24]                 | 13 (72.2) [18]                  |
| ACR50                                                                     | 11 (45.8) [24]                 | 12 (66.7) [18]                  |
| ACR70                                                                     | 11 (45.8) [24]                 | 10 (55.6) [18]                  |
| ACR90                                                                     | 8 (33.3) [24]                  | 6 (33.3) [18]                   |
| cJADAS-10                                                                 |                                |                                 |
| Median (Q1, Q3) [no. of patients with complete data]                      | 4.8 (1.0, 9.0) [34]            | 3.5 (0.3, 8.3) [28]             |
| ≤ 1.1, n (%) [no. of patients with complete data]                         | 9 (26.5) [34]                  | 8 (28.6) [28]                   |
| Change in cJADAS-10, median (Q1, Q3) [no. of patients with complete data] | -1.0 (-5.0, 0) [27]            | -4.0 (-6.0, 0) [20]             |
| ACR provisional clinical inactive disease, n (%)                          | 13 (31.7)                      | 10 (29.4)                       |

N = number of patients who initiated etanercept after registry enrollment, had a registry visit  $\pm$  14 days from etanercept initiation, and had at least 6 or 12 months of follow-up time (irrespective of continued etanercept use or follow-up visit data collection). n, number of patients with outcome. Responses could not be calculated for patients missing observations at the baseline or a follow-up visit. ACR = American College of Rheumatology; ACR-Pedi Response = American College of Rheumatology-Pediatric Response; CARRA = Childhood Arthritis and Rheumatology Research Alliance; cJADAS-10 = clinical Juvenile Arthritis Disease Activity Score 10-joint; LOCF = last observation carried forward; Q1 = quartile 1; Q3 = quartile 3.

**Supplementary Table 4.** ACR-Pedi, cJADAS-10, and ACR provisional clinical inactive disease responses with etanercept in the effectiveness cohort by NRI

| Outcome                                          | Response                    |                              |
|--------------------------------------------------|-----------------------------|------------------------------|
|                                                  | 6-month follow-up<br>N = 41 | 12-month follow-up<br>N = 34 |
| ACR-Pedi Response, n (%)                         |                             |                              |
| ACR30                                            | 12 (29.3)                   | 4 (11.8)                     |
| ACR50                                            | 10 (24.4)                   | 4 (11.8)                     |
| ACR70                                            | 10 (24.4)                   | 3 (8.8)                      |
| ACR90                                            | 7 (17.1)                    | 1 (2.9)                      |
| cJADAS-10                                        |                             |                              |
| ≤ 1.1, n (%)                                     | 9 (22.0)                    | 7 (20.6)                     |
| ACR Provisional Clinical Inactive Disease, n (%) | 14 (34.1)                   | 7 (20.6)                     |

N = number of patients who initiated etanercept after registry enrollment, had a registry visit  $\pm$  14 days from etanercept initiation, and had at least 6 or 12 months of follow-up time (irrespective of continued etanercept use or follow-up visit data collection). n, number of patients with outcome. Responses could not be calculated for patients missing observations at the baseline or a follow-up visit. ACR = American College of Rheumatology; ACR-Pedi Response = American College of Rheumatology-Pediatric Response; CARRA = Childhood Arthritis and Rheumatology Research Alliance; cJADAS-10 = clinical Juvenile Arthritis Disease Activity Score 10-joint; NRI = non-responder imputation.
